# Supplementary material for: Eed-dependent histone modification orchestrates the iNKT cell developmental program alleviating liver injury
Source: Frontiers journal article supplement (doi:10.3389/fimmu.2024.1467774), 2024-09-20
Supplement: Data_Sheet_1.pdf [file Data_Sheet_1.pdf]

## Supplementary Material

### 1 Supplementary Data

Supplementary Material includes 7 Supplementary Figures and 2 Tables.

### 2 Supplementary Figures and Tables

#### 2.1 Supplementary Figures

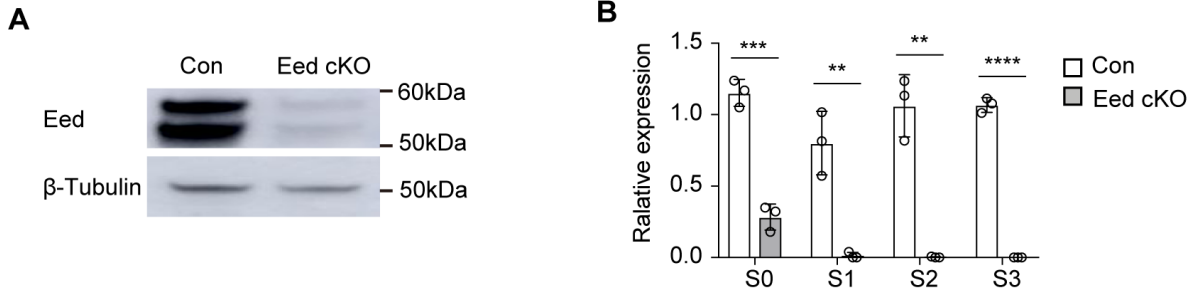

#### Supplementary Figure 1. The expression of Eed in splenic T cells and thymic iNKT cells

(A) Western blotting analysis of Eed expression was performed on purified splenic T cells from control and Eed cKO mice. β-Tubulin was detected as a loading control. (B) Real-time PCR analysis of *Eed* expression in the indicated thymic iNKT cell populations from control and Eed cKO mice (n=3 each). S0, CD24<sup>+</sup>; S1, CD24<sup>-</sup>CD44<sup>-</sup>NK1.1<sup>-</sup>; S2, CD24<sup>-</sup>CD44<sup>+</sup>NK1.1<sup>-</sup>; and S3, CD24<sup>-</sup>CD44<sup>+</sup>NK1.1<sup>+</sup> cells are gated on TCRβ<sup>+</sup>CD1d-Tet<sup>+</sup>iNKT cells. The expressions were normalized to *Ywhaz*. Data are Mean ± SD with statistical significance determined by multiple t-tests. *p* values are represented as \*\*, <0.01; \*\*\*, <0.001; \*\*\*\*, <0.0001. Data are representative of two independent experiments.

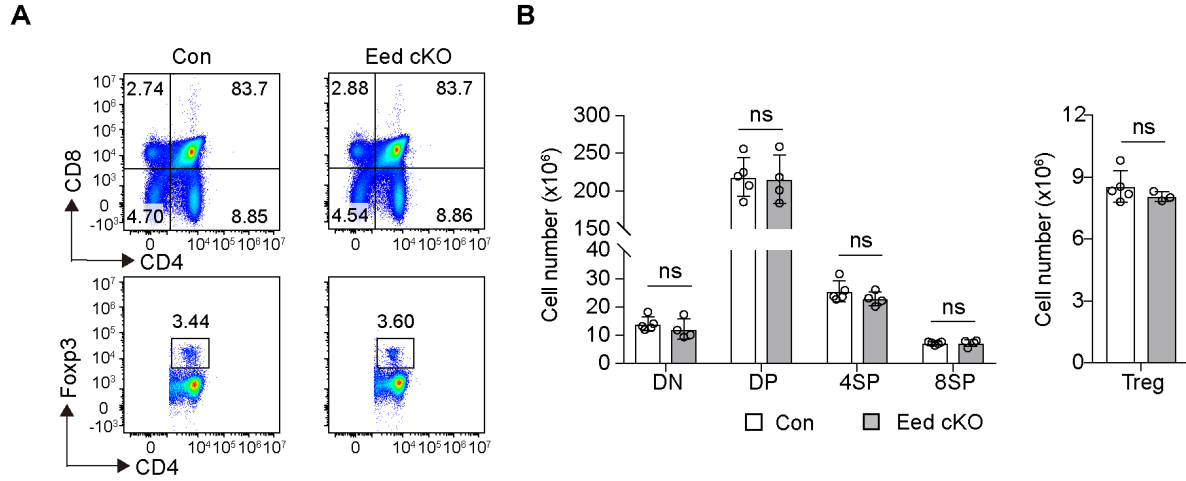

**Supplementary Figure 2. Eed is dispensable for the development of thymocyte and thymic regulatory T cells**

(A) Representative FACS plot of CD4, CD8, and Foxp3 expression in the thymus from control and Eed cKO mice. (B) Absolute cell number of the indicated subsets in the thymus from control (n=5) and Eed cKO (n=4) mice. DN, CD4<sup>-</sup>CD8<sup>-</sup>; DP, CD4<sup>+</sup>CD8<sup>+</sup>; 4SP, CD4<sup>+</sup>CD8<sup>-</sup>; and 8SP, CD4<sup>-</sup>CD8<sup>+</sup>; Treg, CD4<sup>+</sup>CD8<sup>-</sup>Foxp3<sup>+</sup>. Data are mean  $\pm$  SD with statistical significance determined by unpaired or multiple t-tests. ns, not significant. Data are representative of more than two independent experiments.

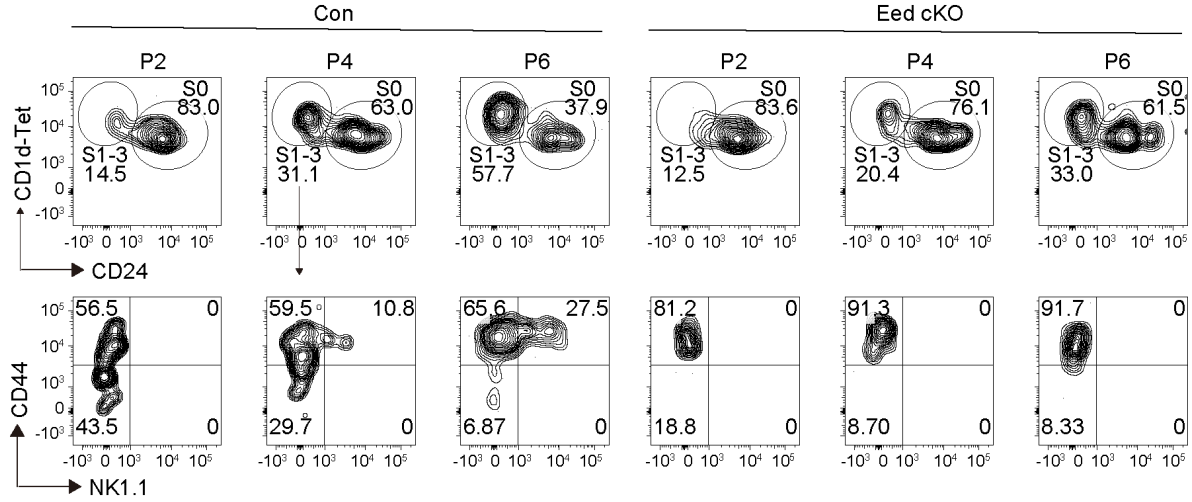

**Supplementary Figure 3. The development of iNKT cells in neonatal mice.**

Representative FACS plots of the thymic iNKT populations from control and Eed cKO mice at postnatal day 2 (P2), 4 (P4), and 6 (P6). Expressions of CD24, CD44, and NK1.1 are analyzed on TCR $\beta$ <sup>+</sup>CD1d-Tet<sup>+</sup>iNKT cells corresponding to the S0 to S3 stages. Data are representative of at least two independent experiments.

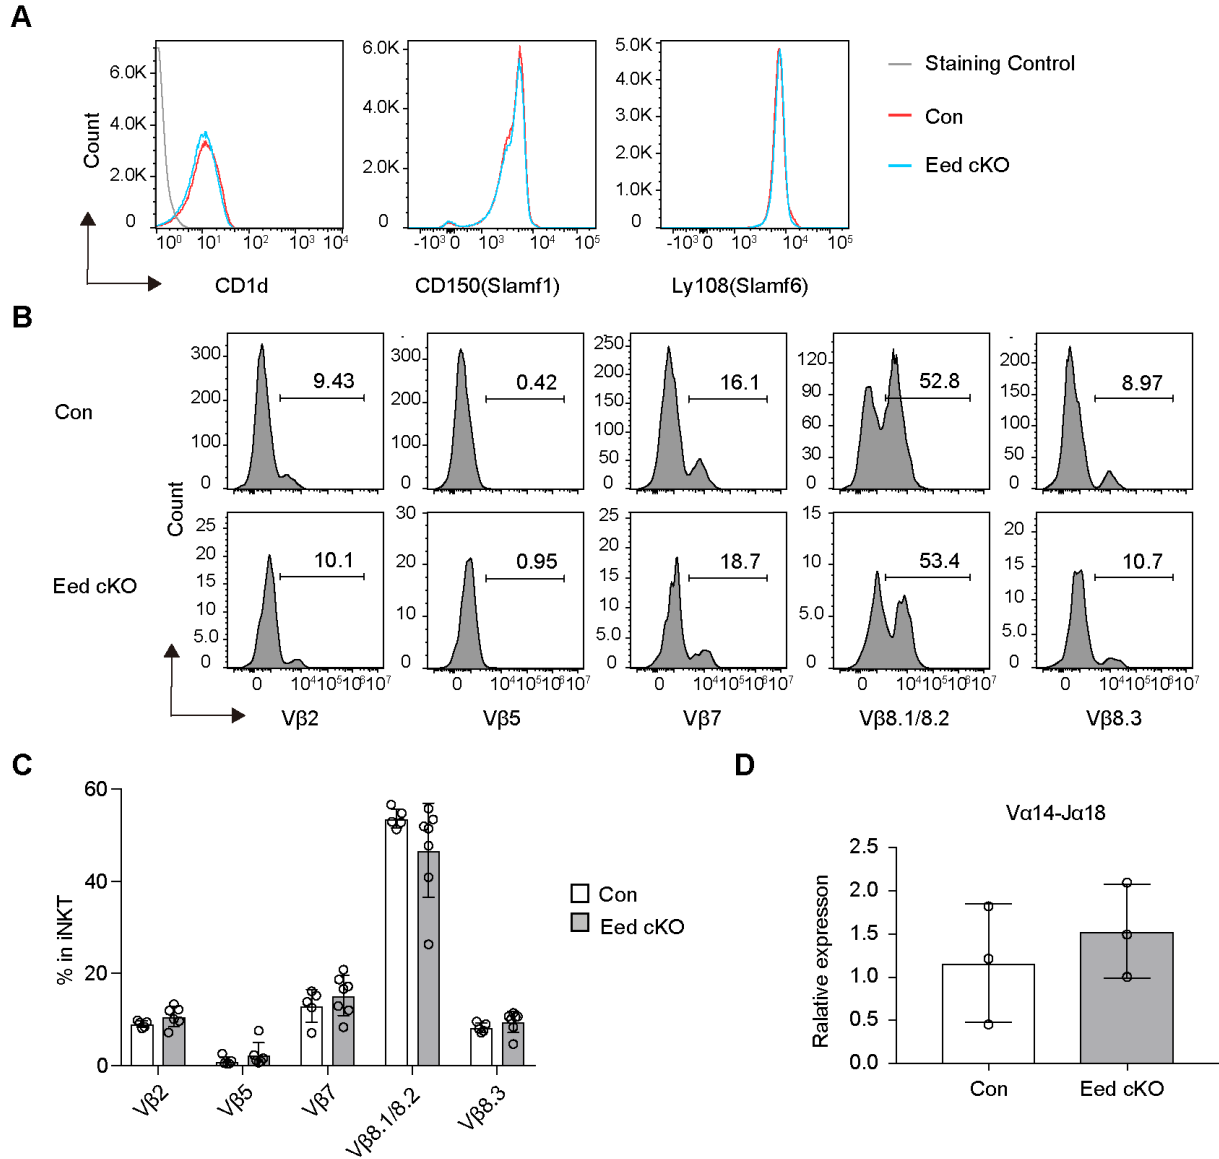

**Supplementary Figure 4. The defects in Eed-deficient iNKT are independent of antigen presentation and TCRαβ rearrangement**

(A) FACS analysis of CD1d, CD150, and Ly108 expression on CD4<sup>+</sup>CD8<sup>+</sup>DP thymocytes from control and Eed cKO mice. (B-C) FACS analysis and percentage of TCRVβ2, Vβ5, Vβ7, Vβ8.1/8.2, and Vβ8.3 levels in thymic iNKT cells from control (n=5) and Eed cKO (n=7) mice. (D) Real-time PCR of TCRVα14-Jα18 expression normalized to *HPRT* in DP thymocytes from control or Eed cKO mice (n=3 each). Data are mean ± SD with statistical significance determined by unpaired t-test. Data are representative of at least two independent experiments.

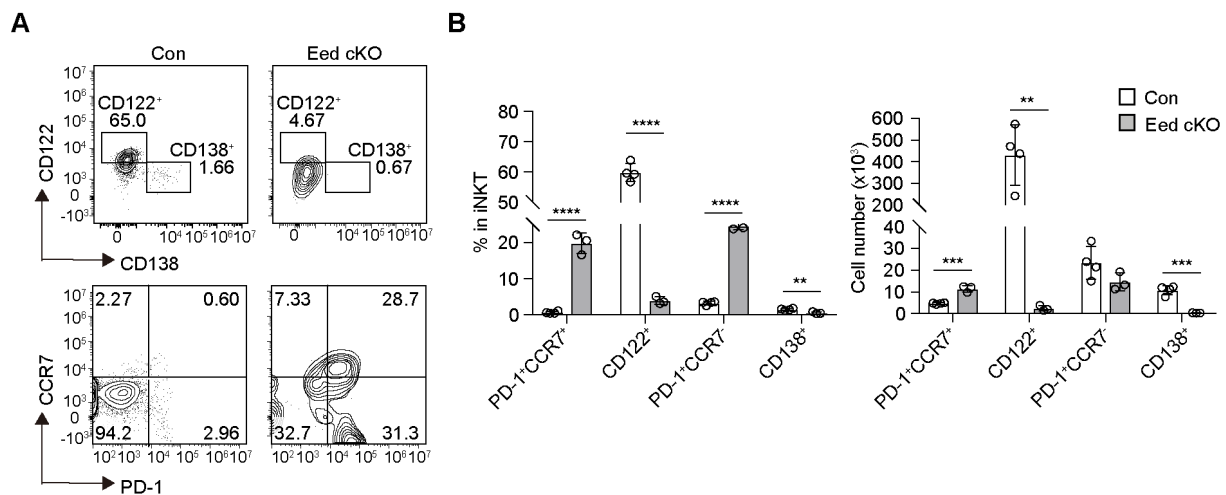

### Supplementary Figure 5. Eed is essential for the development of NKT1 and NKT17 cells

(A-B) Representative FACS plot, percentage, and absolute cell number of the indicated thymic TCR $\beta$ <sup>+</sup>CD1d-Tet<sup>+</sup>CD24<sup>-</sup> iNKT populations from control and Eed cKO mice based on CD122, CD138, CCR7 and PD-1 expression and determined as CD122<sup>+</sup>NKT1, CD138<sup>+</sup>NKT17 and PD-1<sup>+</sup>CCR7<sup>+</sup> NKTP and PD-1<sup>+</sup>CCR7<sup>-</sup>NKT2 cells (n=3-4 each). Data are mean  $\pm$  SD with statistical significance determined by unpaired t-test. *p* values are represented as \*\*, <0.01; \*\*\*, <0.001; \*\*\*\*, <0.0001. Data are representative of two independent experiments.

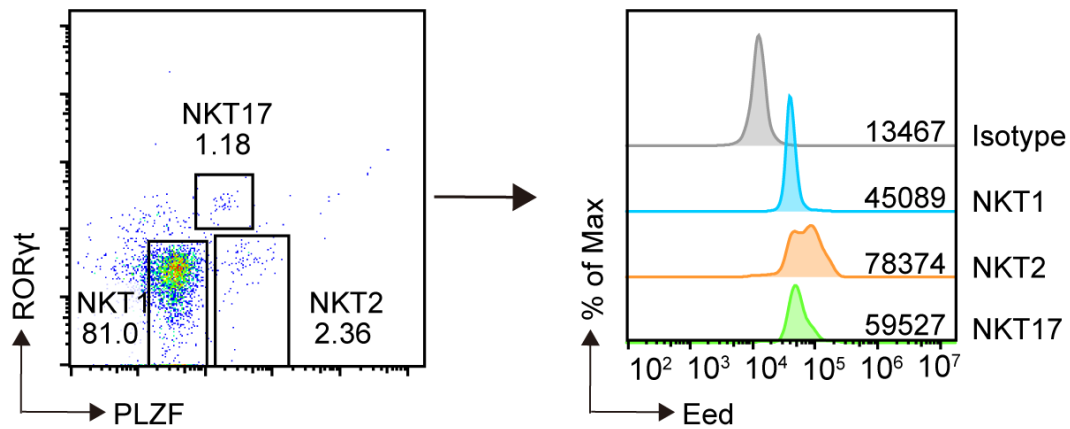

### Supplementary Figure 6. The expression of Eed in iNKT cell subsets

Representative FACS plot of NKT1, NKT2, and NKT17 gated on thymic TCRβ<sup>+</sup>CD1d-Tet<sup>+</sup> iNKT populations from control mice based on RORγt and PLZF expression (*left*). Eed expression was shown in histograms and the number showed MFI of each subset (*right*). Data are representative of two independent experiments.

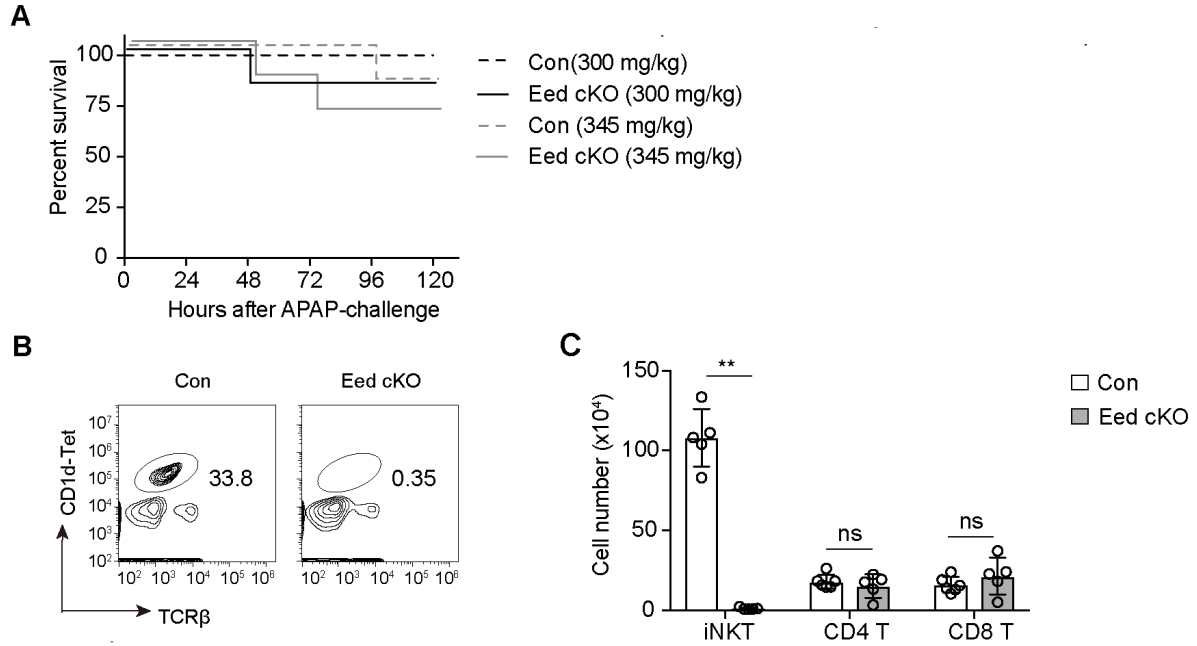

### Supplementary Figure 7. APAP-induced liver injury in Eed-deficient mice

(A) Survival curve of Control and Eed cKO male mice treated with 300 mg/kg or 345 mg/kg APAP ( $n=3-6$  each). (B) Representative FACS plot of liver iNKT cells. (C) Absolute number of iNKT cells, CD4 T ( $CD4^+CD1d-Tet^-TCR\beta^{hi}$ ) cells, and CD8 T ( $CD8^+TCR\beta^{hi}$ ) cells in the liver from control and Eed cKO mice at 24 h after APAP treatment ( $n=5$  each). Data are mean  $\pm$  SD with statistical significance determined by unpaired t-test.  $p$  values are represented as \*\*,  $<0.01$ . ns, not significant. Data are representative of at least two independent experiments.

## 2.2 Supplementary Tables

**Supplementary Table 1. ChIP-qPCR primers**

| Gene            | Forward (5'-3')          | Reverse (5'-3')           |
|-----------------|--------------------------|---------------------------|
| Hoxa11 (1)      | GCTGCGAAGAAGGTGCTGAACG   | CGGTGGGTGAGGGATACTCTCTGG  |
| Gapdh (2)       | GCGCGAAAGTAAAGAAAGAAGCCC | AGCGGCCCGGAGTCTTAAGTATTAG |
| Zbtb16 -200 (2) | CGGTGGTGATTTGCTAACCT     | GAACTGTTGCTCCGGATCTC      |
| Zbtb16 3' UTR   | CGTCTGGATAGTCACGCCTC     | GACCAGTGAGCAGCTTGGAT      |
| p16Ink4a        | ACACGTGTGCACTTCTTTGC     | AGCGCTAAAGGATCGGACAG      |
| p19Arf          | CTCACCTCGCTTGTCACAGT     | GGATCGCACGAACTTCACCA      |
| p21             | CCGACGCTATAAGGAGGCAG     | CCACGAAGCTCTCACCTCTG      |

## Reference

1. Sun B, Chang E, Gerhartl A, Szele FG. Polycomb Protein Eed Is Required for Neurogenesis and Cortical Injury Activation in the Subventricular Zone. *Cereb Cortex* (2018) 28(4):1369-82. Epub 2018/02/08. doi: 10.1093/cercor/bhx289.
2. Pereira RM, Martinez GJ, Engel I, Cruz-Guilloty F, Barboza BA, Tsagaratou A, et al. Jarid2 Is Induced by Tcr Signalling and Controls Inkt Cell Maturation. *Nat Commun* (2014) 5:4540. Epub 2014/08/12. doi: 10.1038/ncomms5540.



**Supplementary Table 2. The list of DEGs from RNA-seq and the H3K27me3 ChIP-seq analyses.**

| FC>2 in RNA-seq<br>& up in H3K27me3<br>ChIP-seq | FC<0.5 in RNA-seq<br>& up in H3K27me3<br>ChIP-seq | FC>2 in RNA-seq &<br>down in H3K27me3<br>ChIP-seq | FC<0.5 in RNA-seq &<br>down in H3K27me3<br>ChIP-seq |
|-------------------------------------------------|---------------------------------------------------|---------------------------------------------------|-----------------------------------------------------|
| Adam23                                          | 4921507P07Rik                                     | Adcy1                                             | Ankrd35                                             |
| Arhgap42                                        | Alpk2                                             | Amot                                              | Apobr                                               |
| Arhgef12                                        | Ankmy1                                            | Apbb1                                             | Arhgap28                                            |
| Arhgef40                                        | Apol10b                                           | Cd163l1                                           | Arrdc4                                              |
| Asb4                                            | BC034090                                          | Cd209a                                            | Arsb                                                |
| Cfap126                                         | C2cd2                                             | Cds1                                              | Btc                                                 |
| Chst11                                          | Card10                                            | Crip2                                             | Cacna1h                                             |
| Cldn1                                           | Cd207                                             | Diras2                                            | Ccl6                                                |
| Col6a1                                          | Cib2                                              | Echdc2                                            | Chrb2                                               |
| Fer116                                          | Ctla4                                             | Eml1                                              | Csfl                                                |
| Gnaz                                            | Dmxl2                                             | Eml2                                              | Csflr                                               |
| Gpr19                                           | Dnah7a                                            | Fam174b                                           | Ctla2b                                              |
| Kitl                                            | Dyrk3                                             | Fbxo48                                            | Cxcr3                                               |
| Map2                                            | Eepd1                                             | Fsd11                                             | D630039A03Rik                                       |
| Mfsd9                                           | Exph5                                             | Gapt                                              | Dnah11                                              |
| Mst1r                                           | Fn1                                               | Gm14548                                           | Dnase112                                            |
| Pcdhb16                                         | Hecw2                                             | Gm31255                                           | Eed                                                 |
| Phldb1                                          | Il18rap                                           | Gm44504                                           | Ehbp1                                               |
| Pkp1                                            | Il5ra                                             | Gm51877                                           | Elov12                                              |
| Prss50                                          | Klra7                                             | Gm6710                                            | Fam151b                                             |
| Rftn2                                           | Klra9                                             | Gpr52                                             | Fes                                                 |
| Ripk4                                           | Klrb1c                                            | H2ac13                                            | Galnt3                                              |
| Scara3                                          | Klrd1                                             | Hey1                                              | Gas2                                                |
| Tmod2                                           | Klre1                                             | Homer2                                            | Gm5454                                              |
| Zbtb16                                          | Klri2                                             | Hspb6                                             | Gpr141                                              |
|                                                 | Klrk1                                             | Iqcd                                              | Gpr68                                               |
|                                                 | Nuak2                                             | Kbtbd13                                           | Gucy1a1                                             |
|                                                 | Plpp2                                             | Kcnk6                                             | Gucy2e                                              |
|                                                 | Plxna4                                            | Krt18                                             | H2-M2                                               |
|                                                 | Ppp2r3a                                           | Macc1                                             | H2bc8                                               |
|                                                 | Sall3                                             | Mpp2                                              | Hdhd3                                               |
|                                                 | Samd3                                             | Myh10                                             | Hopx                                                |
|                                                 | Serpinb12                                         | Myo1d                                             | Il12b                                               |
|                                                 | Socs2                                             | Myt11                                             | Islr                                                |
|                                                 | Tbc1d8                                            | P3h1                                              | Itgam                                               |
|                                                 | Tent5a                                            | Pde6g                                             | Kif24                                               |
|                                                 | Tmbim1                                            | Plat                                              | Klf8                                                |
|                                                 | Ttc12                                             | Plch1                                             | LOC118568006                                        |
|                                                 | Zc3h12c                                           | Pltp                                              | LOC118568020                                        |
|                                                 |                                                   | Ptchd4                                            | Lhfp                                                |
|                                                 |                                                   | Rapgef11                                          | Lhx2                                                |

|  |  |                                                                                                                                                                       |                                                                                                                                                                                                                                                                                                                                                                                                                                   |
|--|--|-----------------------------------------------------------------------------------------------------------------------------------------------------------------------|-----------------------------------------------------------------------------------------------------------------------------------------------------------------------------------------------------------------------------------------------------------------------------------------------------------------------------------------------------------------------------------------------------------------------------------|
|  |  | Rsad2<br>Rxfp1<br>Slc16a2<br>Slc22a23<br>Slc26a1<br>Tex11<br>Tgfb3<br>Tmem158<br>Tmem231<br>Tmod4<br>Trim16<br>Ttc39a<br>Vcan<br>Zfp108<br>Zfp947<br>Zgrf1<br>Zscan10 | Loxl4<br>Lpcat2<br>Map3k9<br>Map6<br>Mcf2l<br>Mertk<br>Metrl<br>Mpo<br>Myo19<br>Naip2<br>Naip6<br>Nbea<br>Niban2<br>Notch3<br>Nqo1<br>Osgin1<br>Otud7b<br>Pde10a<br>Pfkfb1<br>Pkn3<br>Ppp1r26<br>Prkaa2<br>Ptpn21<br>Pygl<br>Rapgef5<br>Reln<br>Rgs1<br>S100a6<br>Serpina3g<br>Shc4<br>Slc4a11<br>Spata7<br>St8sia6<br>Syt3<br>Tifab<br>Tlr13<br>Tshz2<br>Usp35<br>Vcam1<br>Vipr2<br>Wdfy3<br>Wdr60<br>Zbtb32<br>Zfp870<br>Zfp937 |
|--|--|-----------------------------------------------------------------------------------------------------------------------------------------------------------------------|-----------------------------------------------------------------------------------------------------------------------------------------------------------------------------------------------------------------------------------------------------------------------------------------------------------------------------------------------------------------------------------------------------------------------------------|
